# Supplementary material
Source: PubMed Central journal article supplement (PMC9696767)
Supplement: tp-106-2399-s001.pdf [file tp-106-2399-s001.pdf]

**Figure S1.** Age distribution by organ transplant group in the SRTR

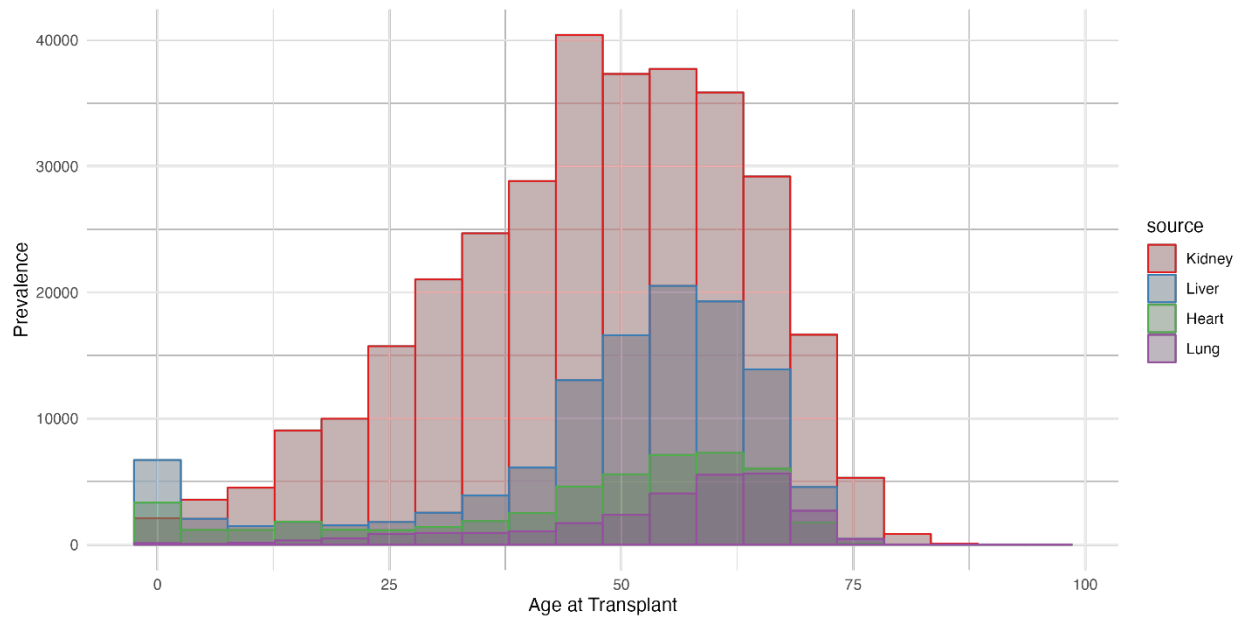

**Figure S2.** Cumulative excess mortality (per 10,000) from months 1 to 20 from March 1, 2020, in age 45-64 in the four organ groups and the US population.

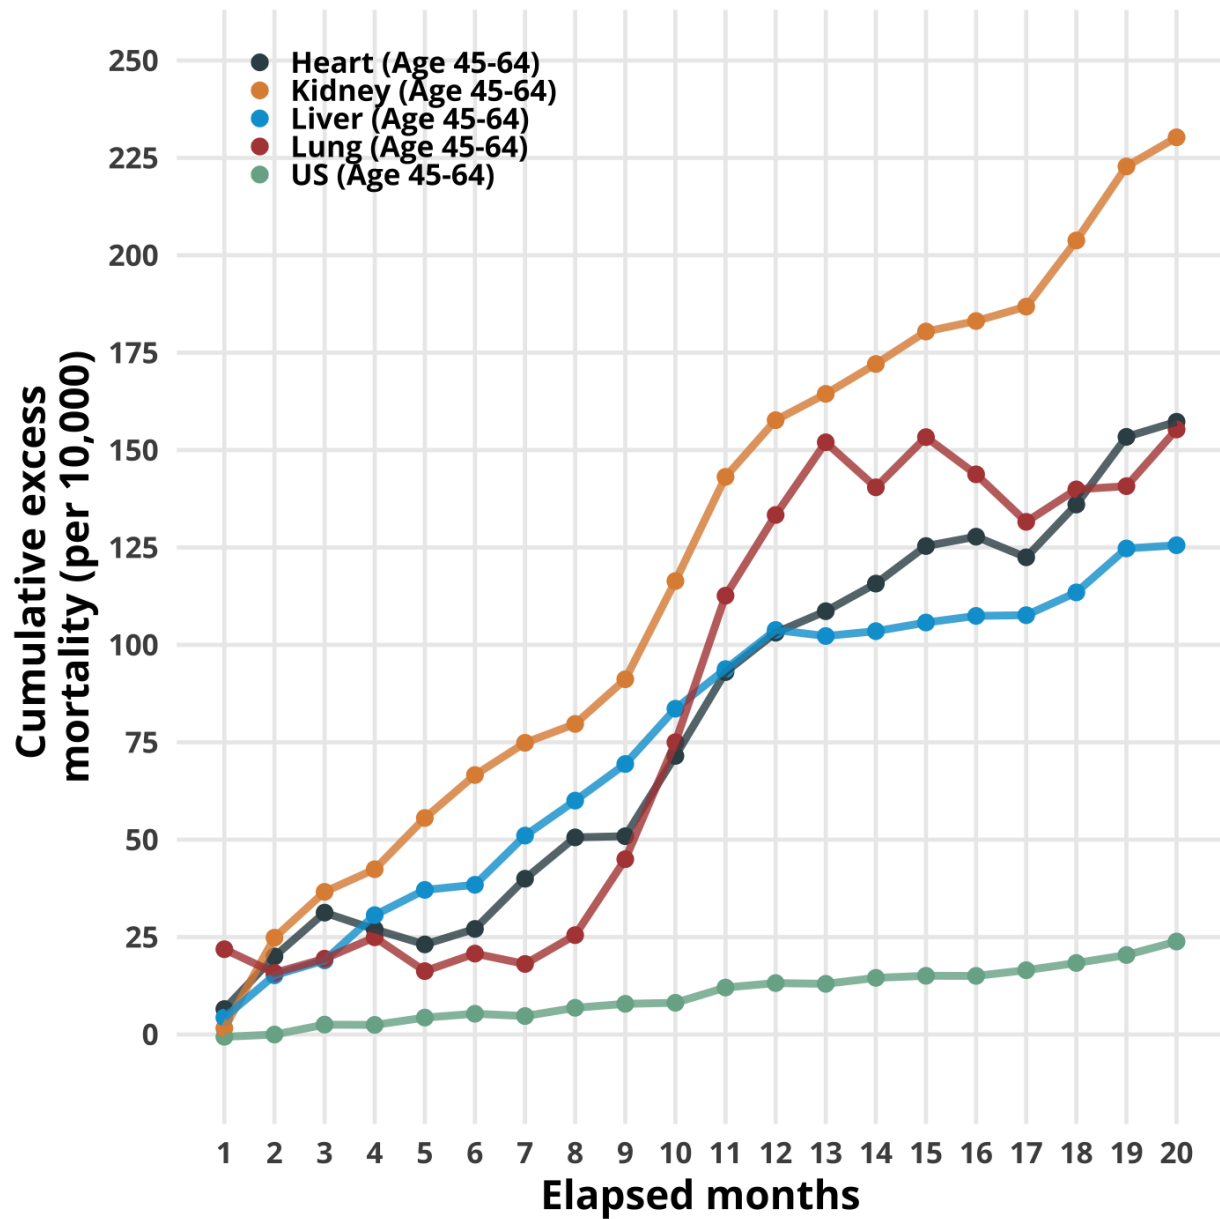

**Table S1.** Cumulative observed deaths, expected deaths, excess deaths, excess deaths per 10,000, and deaths from COVID-19 by race and ethnicity stratified by organ type in the SRTR. Values are the results at months 20 from March 1, 2020.

| Organ  | Race/Ethnicity | Observed deaths | Expected deaths (CI)     | Excess deaths (CI)       | Excess deaths per 10,000 (CI) | Deaths from COVID-19 (% observed) |
|--------|----------------|-----------------|--------------------------|--------------------------|-------------------------------|-----------------------------------|
| Heart  |                |                 |                          |                          |                               |                                   |
|        | Asian          | 90              | 73.4 (40.5 , 106.8)      | 16.6 (-16.8 , 49.5)      | 125.8 (-120.8 , 368.2)        | 5 (5.6 %)                         |
|        | Black          | 697             | 534.5 (436.2 , 632)      | 162.5 (65 , 260.8)       | 229.5 (91.2 , 369.1)          | 74 (10.6 %)                       |
|        | White          | 2225            | 1927.5 (1698.4 , 2153.6) | 297.5 (71.4 , 526.6)     | 103.1 (24.8 , 182.5)          | 247 (11.1 %)                      |
|        | Hispanic       | 267             | 227.5 (170.8 , 284.3)    | 39.5 (-17.3 , 96.2)      | 102.1 (-46.8 , 250.5)         | 42 (15.7 %)                       |
|        | Non-Hispanic   | 2787            | 2361.2 (2111.8 , 2610.5) | 425.8 (176.5 , 675.2)    | 125.6 (52.2 , 199)            | 288 (10.3 %)                      |
| Kidney |                |                 |                          |                          |                               |                                   |
|        | Asian          | 691             | 521.1 (419.9 , 621)      | 169.9 (70 , 271.1)       | 98.3 (40.6 , 156.7)           | 119 (17.2 %)                      |
|        | Black          | 4519            | 2836.7 (2436.6 , 3233.1) | 1682.3 (1285.9 , 2082.4) | 253.3 (193.5 , 313.6)         | 751 (16.6 %)                      |

|  |          |      |                         |                          |                       |               |
|--|----------|------|-------------------------|--------------------------|-----------------------|---------------|
|  | White    | 9592 | 6513.7 (5763.4 , 7260)  | 3078.3 (2332 , 3828.6)   | 170.7 (129.3 , 212.4) | 1501 (15.6 %) |
|  | Hispanic | 2422 | 1115.4 (872.9 , 1356.3) | 1306.6 (1065.7 , 1549.1) | 280.9 (229.2 , 333)   | 671 (27.7 %)  |

Supplementary page 4

|       |              |       |                          |                          |                        |              |
|-------|--------------|-------|--------------------------|--------------------------|------------------------|--------------|
|       | Non-Hispanic | 12675 | 8990.7 (8092.8 , 9898.8) | 3684.3 (2776.2 , 4582.2) | 165.6 (124.7 , 206.1)  | 1772 (14 %)  |
| Liver |              |       |                          |                          |                        |              |
|       | Asian        | 160   | 187.5 (120.4 , 255)      | -27.5 (-95 , 39.6)       | -57.2 (-197.9 , 82.7)  | 11 (6.9 %)   |
|       | Black        | 543   | 463 (357.7 , 570.7)      | 80 (-27.7 , 185.3)       | 91.9 (-31.2 , 212.2)   | 38 (7 %)     |
|       | White        | 5166  | 4184.7 (3833.2 , 4536.4) | 981.3 (629.6 , 1332.8)   | 115.9 (74.5 , 157.3)   | 388 (7.5 %)  |
|       | Hispanic     | 905   | 548.1 (438.6 , 655.8)    | 356.9 (249.2 , 466.4)    | 233.3 (163.1 , 304.6)  | 122 (13.5 %) |
|       | Non-Hispanic | 5056  | 4361.4 (3968.5 , 4755.3) | 694.6 (300.7 , 1087.5)   | 82.4 (35.8 , 128.8)    | 332 (6.6 %)  |
| Lung  |              |       |                          |                          |                        |              |
|       | Asian        | 53    | 38.8 (16.4 , 61.3)       | 14.2 (-8.3 , 36.6)       | 367.1 (-231.4 , 962.3) | 7 (13.2 %)   |
|       | Black        | 284   | 229.7 (174.4 , 285.5)    | 54.3 (-1.5 , 109.6)      | 363.5 (-6.5 , 730.3)   | 38 (13.4 %)  |

|  |              |      |                          |                       |                        |             |
|--|--------------|------|--------------------------|-----------------------|------------------------|-------------|
|  | White        | 2572 | 2333.4 (2059.5 , 2607.4) | 238.6 (-35.4 , 512.5) | 160.7 (-24.7 , 346.2)  | 244 (9.5 %) |
|  | Hispanic     | 210  | 190.4 (136.6 , 245)      | 19.6 (-35 , 73.4)     | 147.5 (-244.4 , 533.7) | 31 (14.8 %) |
|  | Non-Hispanic | 2720 | 2445.9 (2193.7 , 2698.4) | 274.1 (21.6 , 526.3)  | 177.5 (13.4 , 341.4)   | 262 (9.6 %) |
